# Supplementary material for: Meta-analysis of transcriptomic data reveals clusters of consistently deregulated gene and disease ontologies in Down syndrome
Source: PubMed Central journal article supplement (PMC8496798; doi:10.1371/journal.pcbi.1009317), 2021-09-27
Supplement: pcbi.1009317.s001.pdf [file pcbi.1009317.s001.pdf]

67 studies  
(127 comparisons)

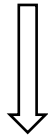

- *Adj.p.value* < 0.05
- *|FC|* > 1.5

51 studies  
(92 comparisons)

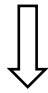

9511 DE  
genes

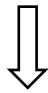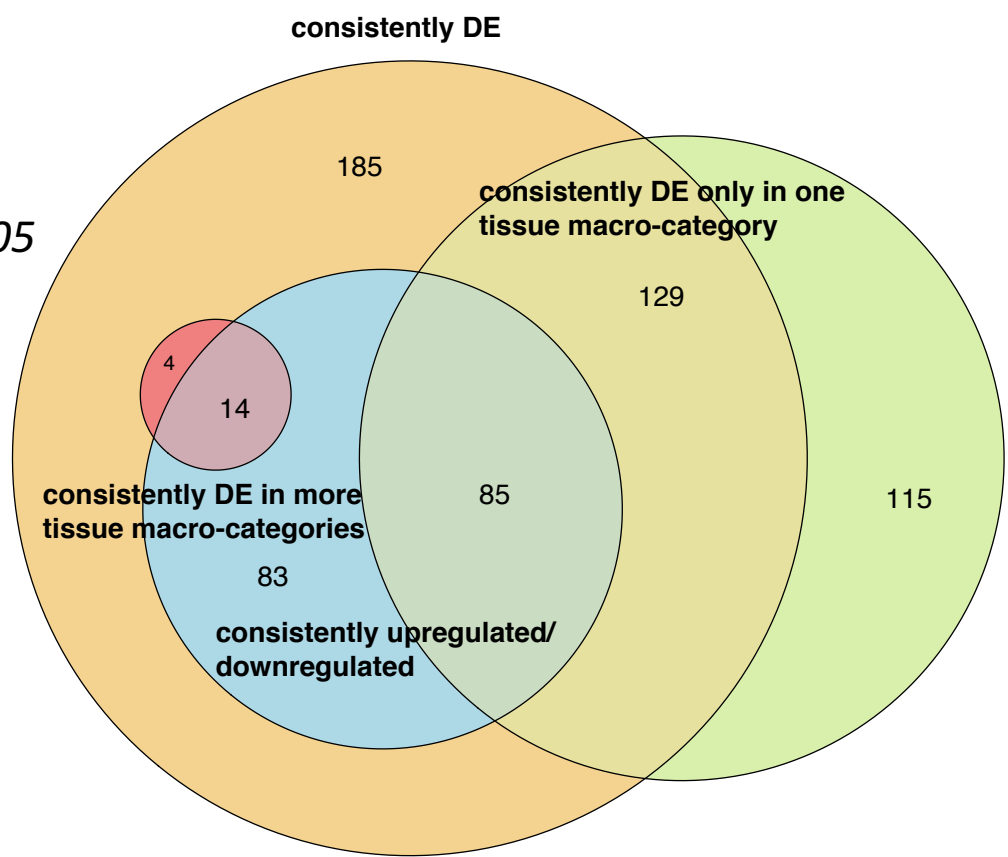

Counting DE occurrences  
per each gene  
across ALL comparisons

Counting DE occurrences per each  
gene across all comparison in each  
tissue MACRO-CATEGORY

Calculation of  
pseudo-t-score

5% of the  
distribution of  
occurrences

5% of the  
distribution of  
pseudo-t-scores

5% of the  
distribution of  
occurrences

Consistently DE  
genes disregarding  
tissue macro-  
categories (top-500)

Genes  
consistently  
upregulated/  
downregulated

Consistently  
DE in more  
tissue macro-  
categories

Consistently  
DE only in one  
tissue-macro-  
category
