# Supplementary material for: Meta-analysis of transcriptomic data reveals clusters of consistently deregulated gene and disease ontologies in Down syndrome
Source: PubMed Central journal article supplement (PMC8496798; doi:10.1371/journal.pcbi.1009317), 2021-09-27
Supplement: pcbi.1009317.s003.pdf [file pcbi.1009317.s003.pdf]

**A.**

GSE84887 GSE9805  
 GSE70102  
 GSE19681 GSE14021  
 GSE38931 GSE11472  
 GSE23910 E-MTAB-312 E-MEXP-654  
 GSE10758 E-MEXP-3355 GSE42956 GSE34458  
 GSE83449 GSE121066 GSE49050 GSE13123 GSE69210  
 GSE84526 GSE14030 E-MTAB-2574 E-MEXP-409  
 GSE1611 GSE16677 GSE99135 GSE68074  
 GSE1789 GSE17459 GSE1294  
 GSE9762  
**GSE59630** GSE101942 GSE5390  
 GSE62538 GSE24272 GSE65055  
 GSE49635 GSE52249  
 SRP188973 GSE11448  
 GSE6283 GSE55504 GSE1397 GSE110064  
 E-MTAB-1238 GSE35561  
 GSE48553 GSE35665 GSE21094  
 GSE4119 GSE42772 GSE84531 GSE33911  
 GSE48051 GSE48611 GSE79842 GSE64840  
 GSE42142 E-TABM-473 GSE16176 GSE58463  
 GSE39159 GSE17760  
 GSE24554 GSE36787

**B.**

GSE70102 GSE65055  
 GSE42142 GSE19681 GSE39159  
 GSE128621 EMATB1238 GSE48051  
 GSE68074 GSE49050.hpc GSE59630vfc.adult  
 GSE21094 GSE6283 GSE49050 GSE16677cells  
 GSE1397.heart GSE6283\_cvs GSE59630dfc.adult GSE69210 GSE1789  
 E-MEXP409 GSE42956fibroblasts GSE13123.P9\_20 GSE121066  
 GSE101942\_neurons GSE48611ipsc  
 GSE4119.amkl GSE84531monocytes GSE24272fetalliver  
 GSE101942\_ipsc GSE99135Ts65Dn.Crtx GSE84526  
 GSE16677blasts GSE99135dp16.Hpcmp GSE49050.ctx  
 E-MEXP3355 GSE59630ofc.postnatal GSE99135Ts1Cje.E15  
 GSE52249 GSE59630vfc.postnatal GSE59630hip.postnatal GSE38931  
 GSE33911 GSE59630ofc.adult GSE59630s1c.postnatal EMTAB312  
 GSE17459aieop GSE59630v1c.postnatal GSE59630v1c.fetal  
 EMTAB2574\_GMP GSE59630IPC.postnatal GSE16176  
 GSE58463Ts2Yah GSE99135Ts65Dn.Crblm GSE110064  
 GSE9805 EMTAB2574\_MEP GSE79842lymphoblastoid GSE24272placenta  
 GSE17459ich GSE99135Ts65Dn.Hpcmp GSE59630itc.postnatal  
 GSE83449 GSE48611neurons GSE99135Ts1Cje.Hpcmp GSE84887  
 GSE64840 GSE99135dp16.Crtx GSE99135Ts1Cje.Crblm GSE55504\_mef  
 GSE55504 GSE59630hip.adult GSE59630mfc.postnatal GSE49050.cer  
 GSE34458 GSE59630itc.adult GSE59630cbc.postnatal GSE11448\_p0  
 GSE59630dfc.fetal GSE59630dfc.postnatal GSE11448\_p10  
 ETABM473 GSE59630stc.postnatal GSE55504\_fibroblasts  
 GSE11448\_p3 GSE99135Ts65Dn.E15 GSE99135dp16.E15  
 GSE1397.crb GSE99135Ts1Cje.Crtx GSE59630cbc.adult  
 GSE55504\_ipsc GSE99135dp16.Crblm GSE49635cortex  
 GSE1294b EMTAB2574\_CMP GSE79842fibroblasts GSE9762  
 GSE24554 GSE84531tcells GSE59630v1c.adult GSE14021  
 GSE35665neonate  
 GSE4119.aml GSE42772h2o2 EMTAB2574\_LSK  
 GSE35561 GSE35665child GSE13123.16\_17  
 GSE1397.astro GSE1397.crb1 GSE1611  
 GSE42956ipcs GSE10758  
 GSE36787 GSE11448\_p7 GSE17760  
 E-MEXP654 GSE62538
