# Supplementary material for: Meta-analysis of transcriptomic data reveals clusters of consistently deregulated gene and disease ontologies in Down syndrome
Source: PubMed Central journal article supplement (PMC8496798; doi:10.1371/journal.pcbi.1009317), 2021-09-27

**a)**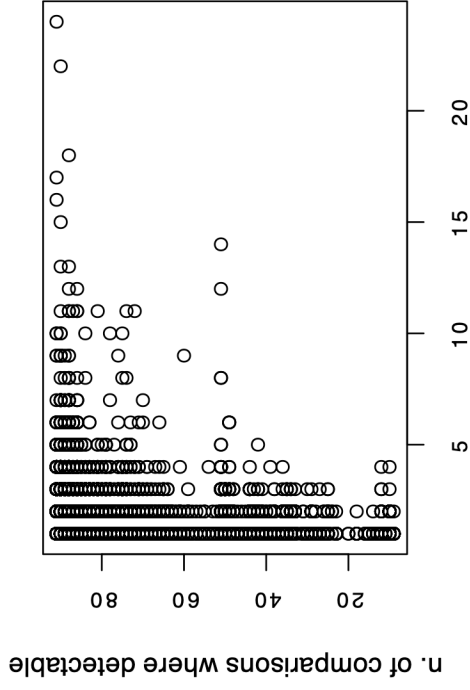**b)**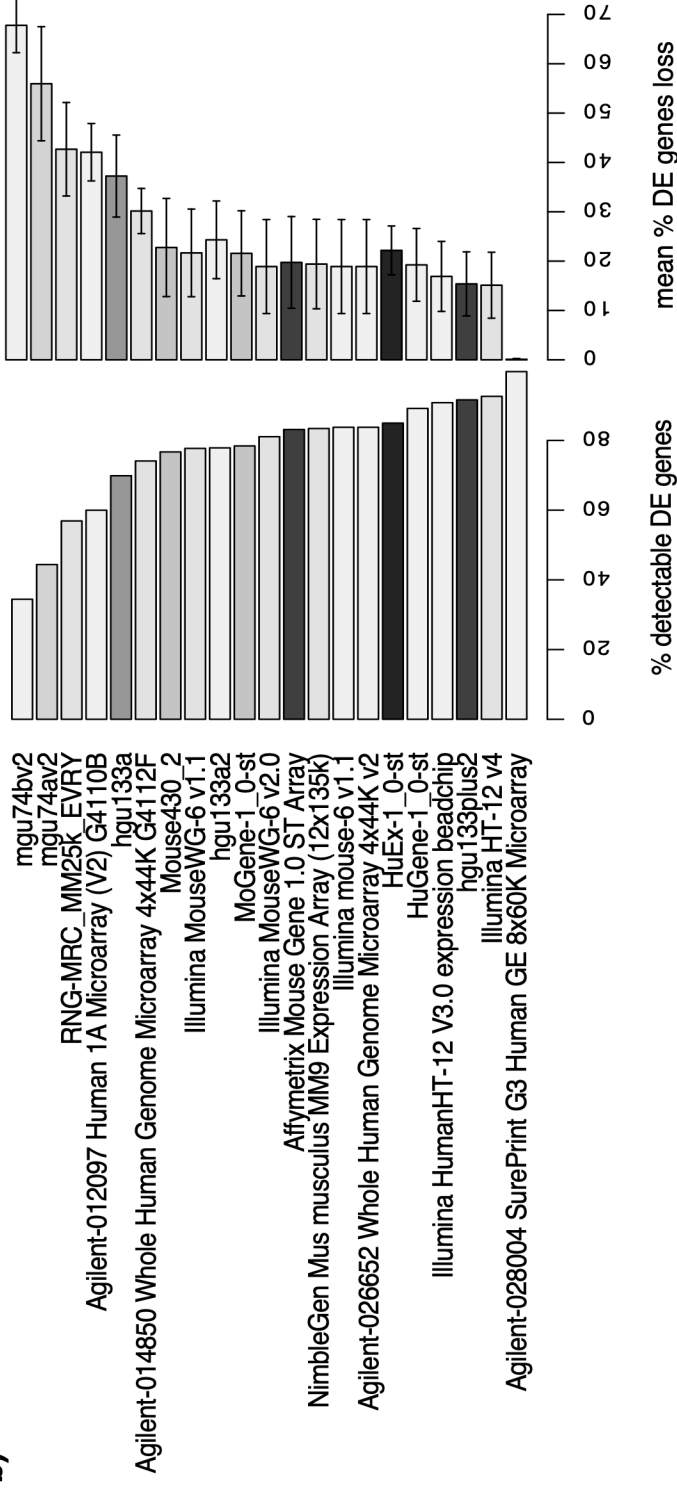**c)**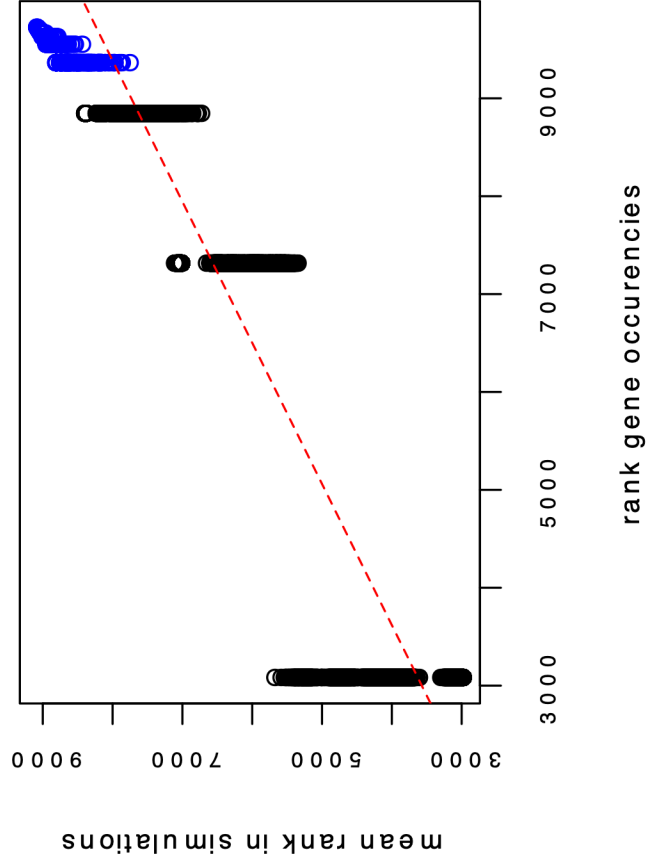**d)**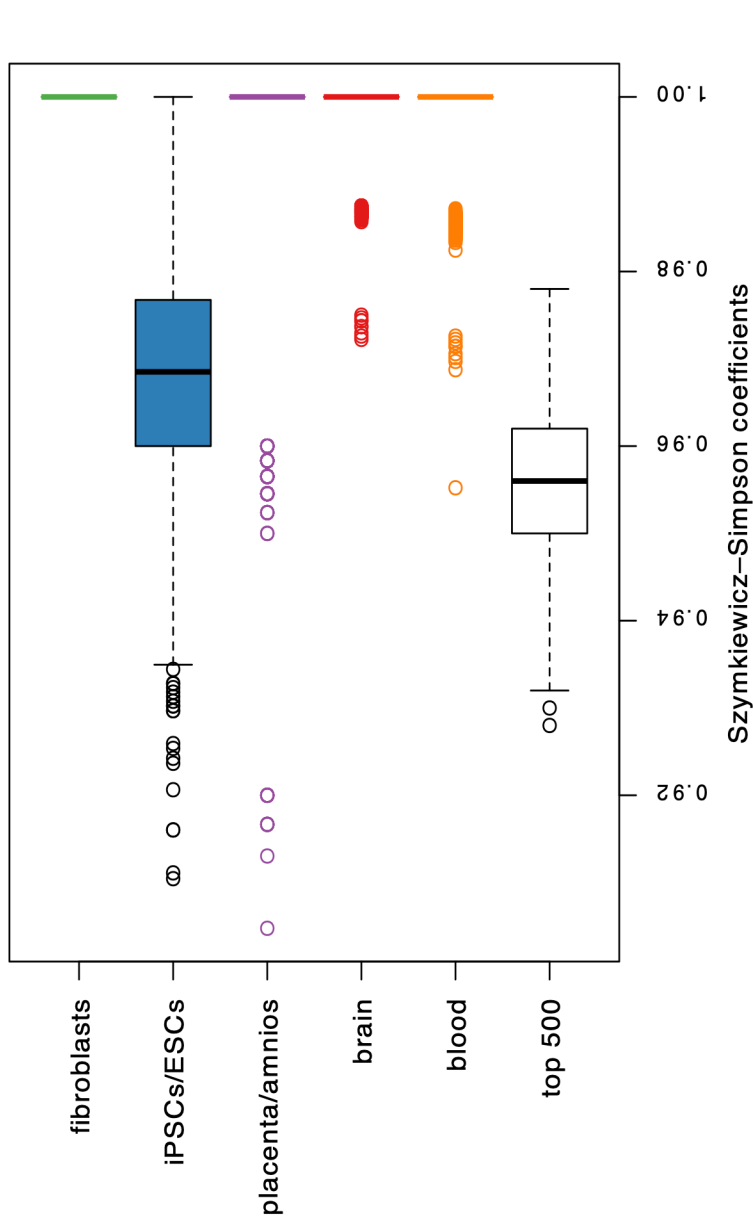

Supplement: pcbi.1009317.s005.pdf [file pcbi.1009317.s005.pdf]
